# Supplementary material
Source: HighWire-hosted journal article supplement (https://jmg.bmj.com/content/60/4/359)
Supplement: inline-supplementary-material-4 [file inline-supplementary-material-4.pdf]

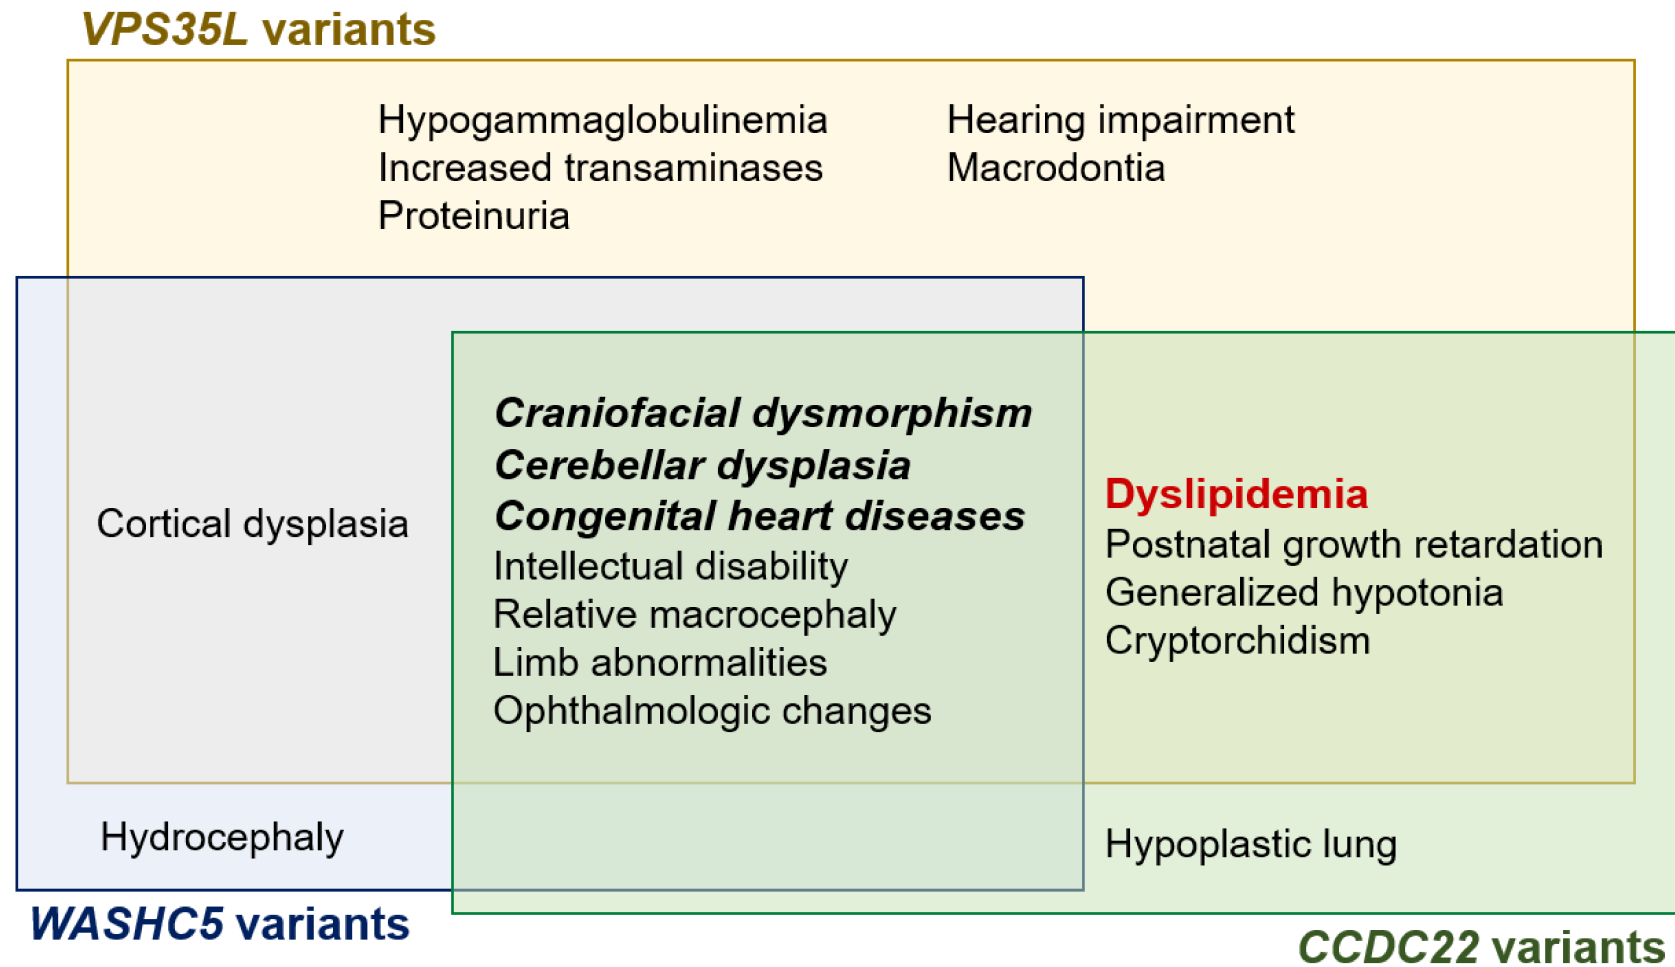

**Figure S3. Venn diagram to show clinical overlap and diversity in VPS35L-, WASHC5-, and CCDC22-associated Ritscher-Schinzel syndrome (RSS).**

Clinical manifestations reported in VPS35L-, WASHC5-, or CCDC22-associated RSS are summarized in this Venn diagram. The bold and italic text represent classical triad of RSS, also known as 3C (cranio-cerebello-cardiac) syndrome. Dyslipidemia is highlighted in bold red text because its pathomechanism was intensively studied in this report.
